# Supplementary material
Source: PubMed Central journal article supplement (PMC7974836)

## Supplementary Online Content

Heier JS, Brown DM, Shah SP, et al. Intravitreal aflibercept injection vs sham as prophylaxis against conversion to exudative age-related macular degeneration in high-risk eyes: a randomized clinical trial. *JAMA Ophthalmol*. Published online March 18, 2021.  
doi:10.1001/jamaophthalmol.2021.0221

**eFigure.** Case Examples of Course of Patients With Nonexudative Choroidal Neovascularization at Baseline

This supplementary material has been provided by the authors to give readers additional information about their work.

**eFigure.** Case Examples of Course of Patients With Nonexudative Choroidal Neovascularization at Baseline

Case 1: (A) Baseline, (B) Month 12, (C) Month 24. Case 2: (D) Baseline, (E) Month 6 (Conversion), (F) Month 24

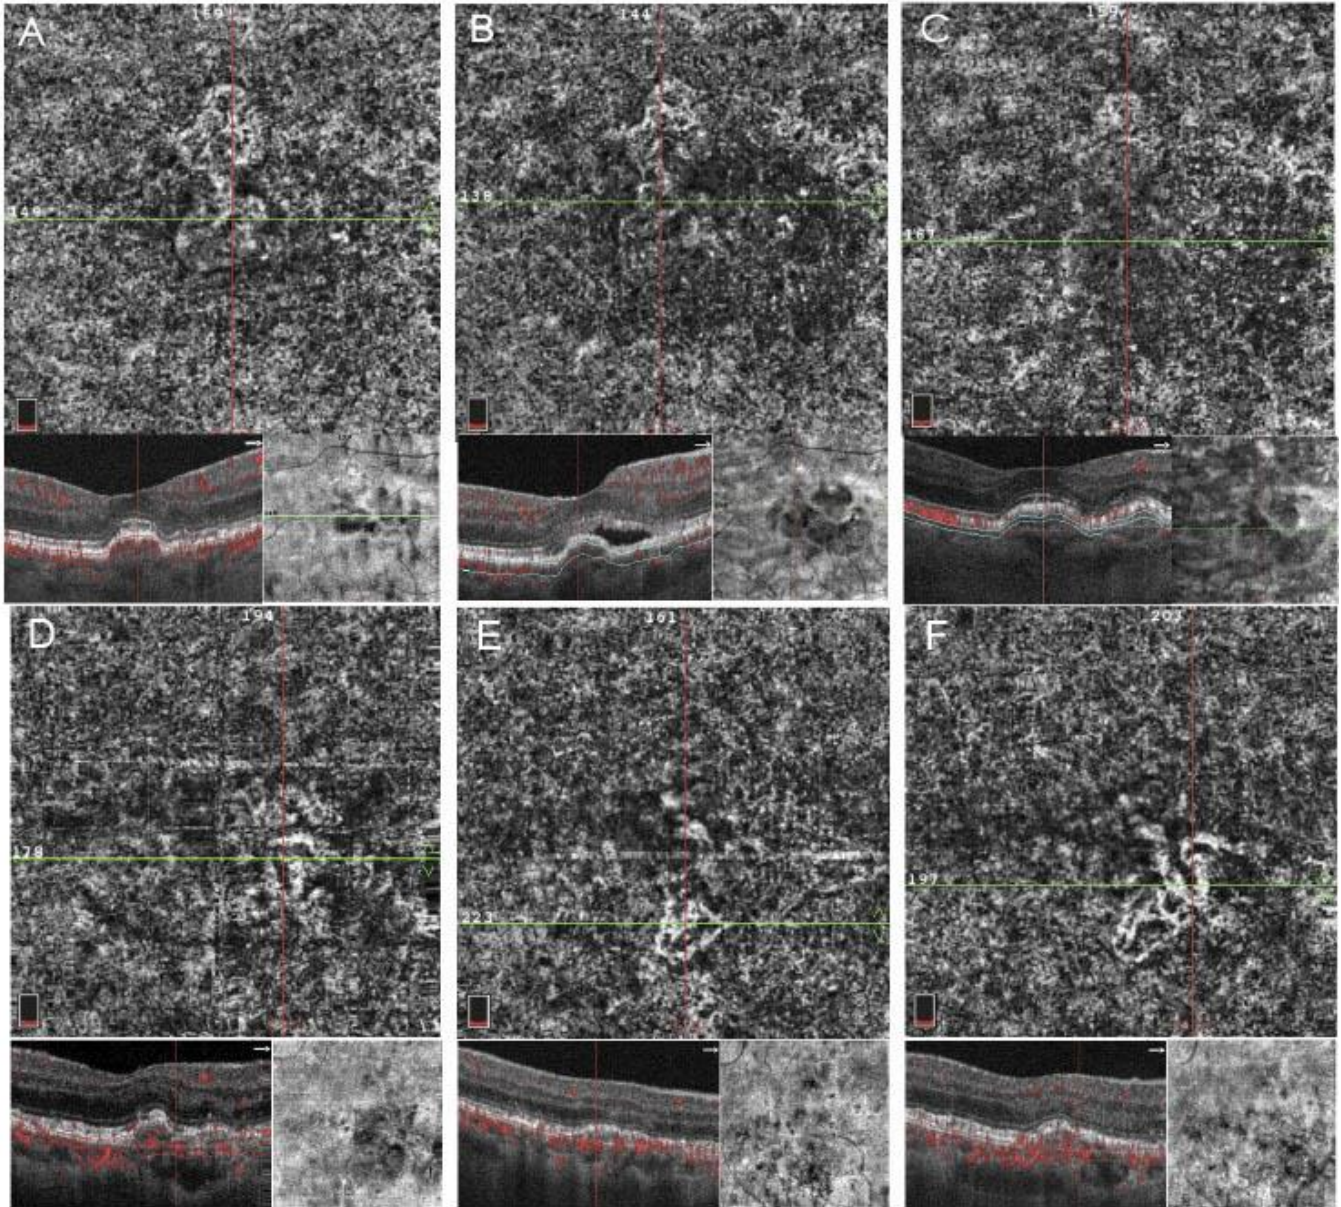

Supplement: jamaophthalmol-e210221-s002.pdf [file jamaophthalmol-e210221-s002.pdf]
