# Supplementary material
Source: PubMed Central journal article supplement (PMC7974836)
Supplement: jamaophthalmol-e210221-s003.pdf [file jamaophthalmol-e210221-s003.pdf]

## Data Sharing Statement

Heier. Intravitreal Aflibercept Injection vs Sham as Prophylaxis Against Conversion to Exudative Age-Related Macular Degeneration in High-Risk Eyes. *JAMA Ophthalmol*. Published March 18, 2021.  
doi:10.1001/jamaophthalmol.2021.0221

### Data

**Data available:** No
